# Supplementary material for: DegS and RseP Homologous Proteases Are Involved in Singlet Oxygen Dependent Activation of RpoE in Rhodobacter sphaeroides
Source: PubMed Central journal article supplement (PMC3818230; doi:10.1371/journal.pone.0079520), 2013-11-05
Supplement: pone.0079520.s001.pdf [file pone.0079520.s001.pdf]

*Rhodobacter sphaeroides* 2.4.1

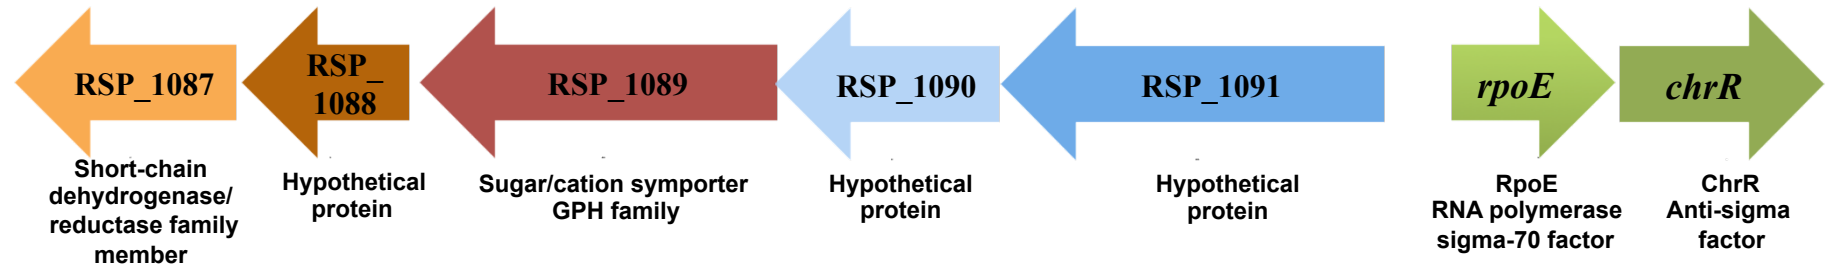

*Roseobacter denitrificans* OCh 114

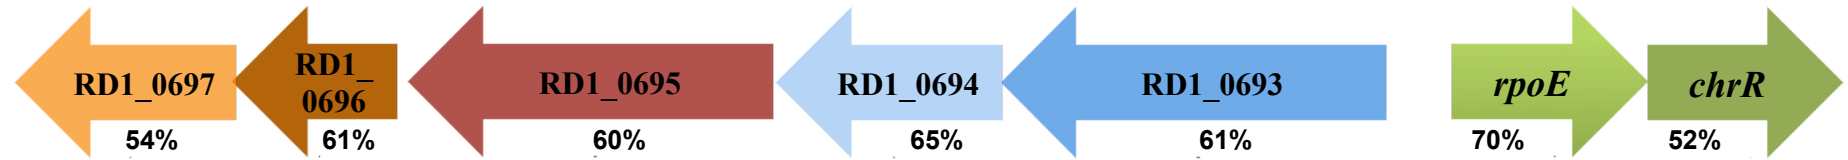

*Oceanicola granulosus* HTCC2516

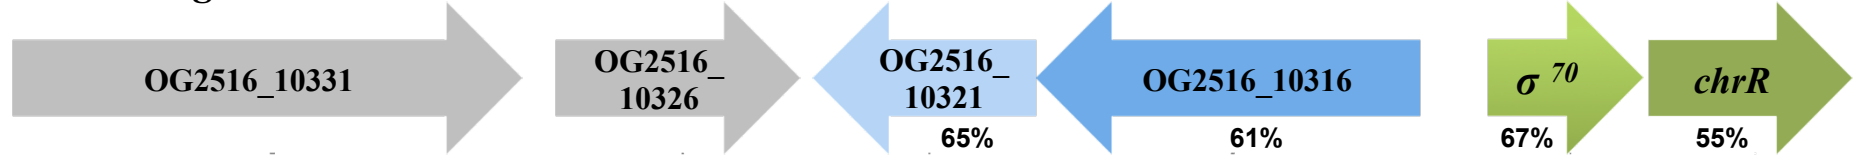

*Caulobacter* sp. K31

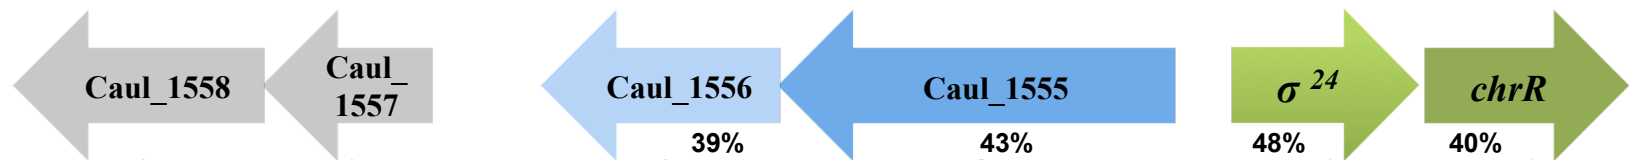

*Rhizobium etli* CIAT 652

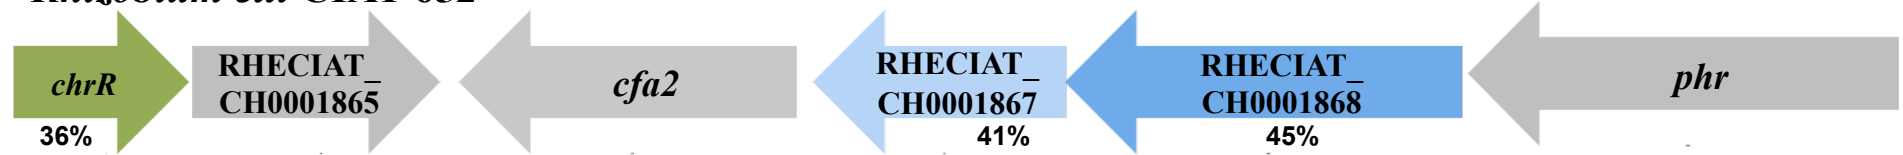

Figure S1
